# Supplementary material
Source: Springer Nature journal article supplement (https://www.springermedizin.de/resource/supplementary/13098_2013_312_MOESM1_ESM.pdf/9671064)
Supplement: MOESM1 [file 9671064]

Patients with an incident diagnosis of T2D  
between January 2004 and October 2011  
N=25,241

Exclude T1D diagnoses  
N=16,941

≥18 years old at index date  
and alive at October 2011  
N=15,929

Had 12 months eligibility before index date  
N=13,136

Not pregnant nor any bariatric surgery during  
12-month pre-index period  
N=12,368

Had at least one valid BMI measure (≥ 18.5)  
during 12-month pre-index period  
N=12,179

Patients without any evidence of diabetes  
between January 2004 and October 2011  
N=50,482

≥18 years old at index date  
and alive at October 2011  
N=38,082

Had 12 months eligibility before index date  
N=30,930

Not pregnant nor any bariatric surgery during  
12-month pre-index period  
N=30,323

Had at least one valid BMI measure (≥ 18.5)  
during 12-month pre-index period  
N=25,177
